# Supplementary material
Source: publisher figshare collection journal article supplement (https://sage.figshare.com/ndownloader/files/18057701)
Supplement: Supplementary file 1 [file 18057701]

References

*Cao, Y.-P., Zhang, Y.-L., Guo, G.-Y., Yuan, D., Sun, S.-Q., Yang, S.-C., . . . Li, J.-G. (2007). A comparison study on domestic violence by geographic settings in Hunan. *Chinese Mental Health Journal,* *21*, 849–852. In Chinese.[AQ: *Cao, Y.-P., Zhang, Y.-L., Guo, G.-Y., Yuan, D., Sun, S.-Q., Yang, S.-C., . . . Li, J.-G. (2007) is not mentioned in the text. Please insert the appropriate citation in the text, or delete the reference.]

*Cao, Y.-P., Zhang, Y.-L., Sun, S.-Q., Guo, G.-Y., Li, Y.-C., Yuan, D., . . . Li, J.-G. (2006). An epidemiological study on family violence in Hunan, China. *Chinese Journal of Epidemiology,* *27*, 200–203. In Chinese.

*Cao, Y.-P., Zhang, Y.-L., Yang, S.-C., Wang, G.-Q., Huang, G.-P., & Guo, G.-P. (2006). Analysis of demographic features on domestic violence. *Chinese Journal of Behavioral Medical Science,* *15*, 251–253. In Chinese.

*Cao, Y.-P., Zhang, Y.-L., Yang, S.-C., Wang, G.-Q., Zhang, Y., & Huang, G.-P. (2008). A comparative study on the patterns of domestic violence. *Chinese Journal of Clinical Psychology,* *16*, 28–30. In Chinese.

*Cao, Y.-P., Zhang, Y.-L., Yang, S.-C., Wang, G.-Q., Zhang, Y., & Huang, G.-P. (2009). Comparison of precipitating factors of domestic violence by geographic setting. *Chinese Journal of Public Health,* *25*, 106–108. In Chinese.

*Chang, L., Huo, L.-Q., Hong, W., Su, Y., Cui, Y., Li, H.-T., . . . Su, Q.-L. (2013). Gender difference of domestic violence in China. *China Journal of Health Psychology, 21*, 1375–1379. In Chinese.

*Chen, B.-X., Wu, H.-M., Shen, W.-L., Rao, S.-C., & Xu, J.-M. (2004). Analysis about family violence in 82 community schizophrenia patients. *Medical Journal of Chinese People Health*, *16*, 468–469. In Chinese.

*Chen, C., Zhao, X.-F., Zhou, Y.-F., & Li, H.-Z. (2007). The social support and family assessment of domestic physical violence on male perpetrators. *Shanghai Archives of Psychiatry*, *19*, 217–218. In Chinese.

*Chen, X., & Xia, Y.-W. (2015). Risk factors for spousal violence based on gender difference: Findings from 748 questionnaires of Hunan Province. *Journal of Hunan Agricultural University (Social Sciences),* *16*, 40–47. In Chinese.

*Chen, X., & Xia, Y.-W. (2016). Gender symmetry of factors for spousal violence victimization: Findings from an empirical research of Hunan Province. *Journal of Northwest A&F University (Social Science Edition),* *16*, 120–125. In Chinese.

*Chen, Y., Cao, Y.-P., Zhang, Y.-L., Guo, G.-Y., & Tan, J. (2014). Comparison of domestic violence status among residents with family violence in an enterprise in Hunan province between 2002 and 2012. *Chinese Journal of Public Health,* *30*, 469–471. In Chinese.

*Cheng, Y.-M., Huang, N., Li, Y., Yan, B.-F., Zhang, Z.-Z., Yue, S.-Z., . . . Shi, Y.-C. (2004). The effect of family violence on the reproductive health. *Maternal and Child Health Care of China,* *19*, 94–96. In Chinese.

*Cui, Y., Hong, W., Su, Y., & Liu, X.-L. (2012). A current situation survey and influential factors of domestic violence in seven provinces and cities of China. *Chinese Journal of Clinical Psychology,* *20*, 360–362. In Chinese.

*Fan, L., Wang, S.-Y., Xiao, X.-M., Ye, Z.-H., Ye, C., Zhang, Z., & Chen, B.-X. (2006). Comparison of domestic violence among women during pregnancy and post-partum between Henan and Guangdong province. *Maternal and Child Health Care of China,* *21*, 2632–2635. In Chinese.

*Gao, Y.-Q., & Jacka, T. (2012). Prevalence of intimate partner violence and its impact on women’s mental health in rural western China: A study of a county in Ningxia. *Journal of Peking University (Health Sciences),* *44*, 379–386. In Chinese.

*Guo, S.-F., Zhao, F.-M., Wu, J.-L., Zhang, T., Wang, L.-H., & Wang, L. (2007). Study on prevalence of domestic violence and its related factors in rural area of China. *Chinese Journal of Public Health,* *23*, 4–6. In Chinese.

*Guo, X., Cheng, Y.-M., Huang, N., Li, Y., Lv, Y.-H., Cai, Y.-M., & Wang, X.-Y. (2006). Analysis on situation and influence factors of domestic violence among infertility couples. *Chinese Journal of Public Health,* *22*, 552–554. In Chinese.

*Hu, M.-N., Zou, S.-H., Zhang, Y., Tong, G.-Y., Ma, R., & Wang, Y. (2018). Correlation between domestic violence and cognitive impairment in patients with alcohol dependence comorbid bipolar disorder. *Sichuan Mental Health,* *31*, 512–515. In Chinese.

*Jiang, Y., Lin, Y.-Q., Pan, F., & Chen, B.-G. (2006). An empirical study on domestic violence in China: A case study of Fujian province. *Jin Ling Law Review,* *10*, 37–67. In Chinese.

*Kong, L.-H., Zheng, W.-G., Zhou, C.-C., Ning, B., Qi, H.-J., Shan, K., & Cui, Y.-M. (2013). Analyzing the relationship between the awareness of domestic violence and suicide ideation of rural women in childbearing period. *Chinese Health Service Management,* *30*, 148–150. In Chinese.

*Li, C.-H., & Jin, X. Y. (2012). The impact of relative conjugal resources and emotional relationships on marital violence in rural-urban migrants’ families: From a gender perspective. *Chinese Journal of Sociology,* *32*, 153–173. In Chinese.

*Li, D.-D., An, L., & Gao, Y.-Q. (2008). Study on prevalence of domestic violence in rural area of Ningxia. *Modern Preventive Medicine,* *35*, 2874–2875. In Chinese.

*Li, Z.-H., Cheng, Y.-M., & Wang, X.-M. (2003). Analysis of domestic violence in rural areas. *Chinese Journal of Behavioral Medical Science*, *12*, 113–115. In Chinese.

*Li, Z.-Q., Li, W., Li, B., Fu, J.-H., & Chen, K.-M. (2002). Present condition of family violence in Wuhan City and the influencing factors. *Medicine and Society,* *15*, 25–27. In Chinese.

*Liu, B.-H., Zeng, H.-Y., Xiao, Q.-J., Sang, P.-X., Peng, Z.-H., & Bao, J.-L. (2016). Analysis of situation and influencing factors on domestic violence during pregnancy. *Chinese Journal of Women and Children Health,* *7*, 49–51. In Chinese.

*Liu, G.-Z., Shi, G.-L., Wang, L.-M., & Lan, F.-R. (2003). The family violence situation of 3025 children′s mothers and effect on the psychosomatic health of mothers and infants. *Chinese General Practice,* *6*, 226–228. In Chinese.

*Liu, X.-C., Chen, W., Zhang, L.-L., Liao, X.-W., & Yang, L. (2016). The relationship between commitment and intimate partner violence. *Chinese Journal of Clinical Psychology,* *24*, 18–22. In Chinese.

*Lu, D., & Zhang, F.-Q. (1997). 101 cases of women injured by husband accident: Analysis of forensic medicine in domestic violence. *The Journal of Law and Medicine,* *4*, 155–157. In Chinese.

*Ma, C., Zhao, X., Wu, L., & Hong, W. (2013). Depression among female victims of intimate partner violence. *Modern Preventive Medicine,* *40*, 3799–3800. In Chinese.

*Ma, R., Zou, S.-H., Dong, H.-B., & Zhang, Y. (2013). A study on social demographic and social culture characteristic of domestic violence on patients with alcohol dependence in Xinjiang. *Sichuan Mental Health,* *26*, 275–278. In Chinese.

*Ma, R., Zou, S.-H., Dong, H.-B., Zhang, Y., & Mo, X. (2013). Drinking behavior of domestic violence on patients with alcohol dependence. *China Journal of Health Psychology,* *21*, 1458–1459. In Chinese.

*Qin, Y.-X. (2018). Analysis of relevant factors between vulnerable women and artificial abortion. *World Latest Medicine Information, 18*, 180–182. In Chinese.

*Song, Y.-P., Tan, L., & Tao, Y. (2014). Will losing land upon marriage exacerbate married women’s risk with domestic violence? Evidence from rural China. *Collection of Women’s Studies,* *23*, 12–21. In Chinese.

*Sun, F., Lou, C.-H., Cheng, Y., & Tu, X.-W. (2012). Study on the attitudes to domestic violence in those married migrant women. *Journal of International Reproductive Health/Family Planning,* *31*, 178–181. In Chinese.

*Tian, G., Luo, W.-L., Chen, Y., Zhou, L., Gao, Y., Qiu, P.-Y., & Li, J. (2014). Study on the effect of domestic violence on depression against rural women in China. *Modern Preventive Medicine,* *41*, 1588–1590. In Chinese.

*Wang, X.-M., & Zhang, Z.-M. (2016). A tentative study on Hui women’s ways to deal with marital violence in Ningxia rural areas. *Journal of Hui Muslim Minority Studies,* *26*, 30–36. In Chinese.

*Wu, J.-L., Guo, S.-F., & Qu, C.-Y. (2006). Investigation of the relationship between induced abortion and domestic violence against women in cities of north China. *Collection of Women’s Studies,* *15*, 30–32. In Chinese.

*Wu, L., Hong, W., Ma, C., Yu, G.-X., & Zhang, Z.-Y. (2013). Analysis of cognition and coping styles of victims in domestic violence. *Chinese Journal of Clinical Psychology,* *21*, 716–718. In Chinese.

*Xiao, J., & Feng, X.-T. (2014). Spousal abuse in China and its influencing factors: From a family system perspective. *Journal of Social Sciences,* *36*, 90–99. In Chinese.

*Xu, A.-Q. (2001). Marital violence: An empirical analysis of the general family. *Quarterly Journal of Shanghai Academy of Social Science,* *17*, 156–165. In Chinese.

*Yang, D.-J., Wu, S.-S., Wu, T.-Q., & Lei, X.-F. (2004). Investigation and analysis of the defense mechanism and domestic violence of male patients with somatization disorder. *National Journal of Andrology,* *10*, 439–442. In Chinese.

*Yang, H.-Q., Ji, H.-Y., Guo, X.-P., Zhang, B., Duan, Y.-L., Liu, C.-G., & Zhang, T.-M. (2008). An analysis of marital violence and psychosocial risk factors of migrant population. *Journal of Shijiazhuang University,* *10*, 109–111. In Chinese.

*Yang, L., & Yang, D.-L. (2006). Analysis of domestic violence in 86 patients of mental illness. *Chongqing Medicine,* *35*, 724–726. In Chinese.

*Yang, L., Yang, D.-L., & Yao, L.-H. (2005). A comparative study of risk factors associated with domestic violence of mental patient. *Chinese Journal of Behavioral Medical Science,* *14*, 911–913. In Chinese.

*Yang, L., Yang, D.-L., Yao, L.-H., Zhuang, J., & Fu, W. (2005). A comparative study on domestic violence in psychotics and its related factors. *Journal of Chongqing Medical University,* *30*, 715–718. In Chinese.

*Yang, S.-C., Zhang, Y.-L., Cao, Y.-P., Wang, G.-Q., Guo, G.-Y., & Huang, G.-P. (2006). To explore the assaulter in domestic violence toward their children. *Chinese Journal of Clinical Psychology,* *14*, 177–179. In Chinese.

*Zeng, Z.-X., Liu, L., Fang, M.-S., & Zhang, G. (2004). The effect of the domestic violence on suicide in patients with depression. *Chinese General Practice, 7*, 1576–1577. In Chinese.

*Zhang, C., Zou, S.-H., & Dong, H.-B. (2014). Research on the social support and coping style in patients with alcohol dependence of family violence. *Sichuan Mental Health,* *27*, 443–445. In Chinese.

*Zhang, W., Hong, W., Cui, Y., & Su, Y. (2014). Gender differences in intimate partner violence. *Chinese Journal of Human Sexuality,* *23*, 96–99. In Chinese.

*Zhang, X., Zheng, W.-G., Kong, L.-H., & Zhou, C.-C. (2013). A study on the situation of cognitive level of fertile woman to domestic violence and its impact factors. *Chinese Health Service Management,* *30*, 224–226. In Chinese.

*Zhang, Y.-L., Cao, Y.-P., Yang, S.-C., Wang, G.-Q., Huang, G.-P., Yu, S.-H., & Guo, G.-Y. (2007). Epidemiological methodology for domestic violence. *Chinese Mental Health Journal,* *18*, 326–328. In Chinese.

*Zhao, F.-M., Guo, S.-F., Wang, L.-H., Zhang, T., Wu, J.-L., & Wang, L. (2007). Investigation on knowledge about domestic violence among married women in rural area of China. *Chinese Journal of Public Health,* *23*, 1–3. In Chinese.

*Zhao, X.-F., Zhang, Y.-L., Fu, W.-Q., Li, L.-F., Zhou, Y.-F., Li, H.-Z., & Yuan, G.-Z. (2007). A study of personalities of physical domestic violence on male perpetrators. *Chinese Journal of Clinical Psychology,* *15*, 543–544. In Chinese.

*Zhao, X.-F., Zhang, Y.-L., Fu, W.-Q., Zhou, Y.-F., Li, H.-Z., & Yuan, G.-Z. (2008a). Effect factors on violence cycles of physical domestic violence. *Chinese Journal of Public Health,* *24*, 631–632. In Chinese.

*Zhao, X.-F., Zhang, Y.-L., Fu, W.-Q., Zhou, Y.-F., Li, H.-Z., & Yuan, G.-Z. (2008b). Logistic regression analysis of the psychosociology of physical domestic violence on male perpetrators. *Chinese Journal of Clinical Psychology,* *16*, 210–212. In Chinese.

*Zhao, X.-F., Zhang, Y.-L., Li, L.-F., Zhou, Y.-F., & Li, H.-Z. (2007). The psychosociology of physical domestic violence on male perpetrators. *China Journal of Health Psychology,* *15*, 1034–1035. In Chinese.

*Zhao, Y.-D., He, G.-X., & Zhu, Y.-N. (2011). Prevention and alleviation: An exploration of the role of social capital in marital violence. *Chinese Journal of Sociology,* *31*, 53–73. In Chinese.

*Zhong, J.-Q., Cao, Y.-Q., Sun, R.-Z., Cao, Y.-P., & Zhang, Y.-L. (2018). Effect of domestic violence during pregnancy on temperament and behavior in preschool offspring. *Chinese Journal of Clinical Psychology,* *26*, 318–321. In Chinese.

*Zhou, L.-G., & Chen, X. (2015). Conditions and factors for spousal violence against migrant women: Empirical research on Xiushui county, Jiangxi province. *Chinese Journal of Population Science,* *29*, 104–114. In Chinese.

*Zhu, Y.-D., Duan, Y., Zhang, Q., Xu, L., & Zhu, P. (2016). Prevalence of intimate partner violence during pregnancy and association with spontaneous preterm birth. *Journal of Hygiene Research,* *5*, 789–794. In Chinese.

*Zhuang, J., Yang, D.-L., Yang, L., & Fu, W. (2006). Analysis of predictive factors for domestic violence behavior in patients with mental disorders. *Journal of Clinical Psychiatry,* *16*, 195–196. In Chinese.

*Zou, S.-H., Zhang, Y.-L., Dang, H.-H., & Huang, G.-P. (2003). Association between domestic violence and suicide in patients with depression. *Chinese Journal of Psychiatry,* *36*, 49–52. In Chinese.

*Zou, S.-H., Zhang, Y.-L., & Huang, G.-P. (2005). Domestic violence in patients with depression. *Chinese Mental Health Journal,* *19*, 539–542. In Chinese.

*Zou, S.-H., Zhang, Y.-L., Zhang, Y., Cao, Y.-P., & Yang, S.-C. (2010). A study on sociodemographic and cultural factors of spousal violence. *Chinese Journal of Clinical Psychology,* *18*, 326–328. In Chinese.

*Zou, S.-H., Zhang, Y.-L., Zhang, Y., Huang, G.-P., Liu, N., & Liu, T. (2007). Association between intimate partner violence and childhood abuse. *Chinese Journal of Public Health,* *23*, 181–182. In Chinese.

*Zou, S.-H., Zhang, Y.-L., Zhang, Y., Liu, N., Cao, Y.-P., & Mo, X. (2009). Impact of psychological preventive intervention on attitudes to spousal violence in newly-married couples. *Chinese Mental Health Journal,* *23*, 814–818. In Chinese.
